# Supplementary material for: Cu(i)-containing MOF as an efficient catalyst for the reactions of carbon dioxide and propargylic alcohols to form carbonates at room temperature
Source: Royal Society of Chemistry journal article supplement (doi:10.1039/d3nj00081h), 2023-01-01
Supplement: d3nj00081h1.pdf [file d3nj00081h1.pdf]

## Supporting Information

# **Cu(I)-containing MOF as efficient catalyst for the reactions of carbon dioxide and propargylic alcohols to carbonates at room temperature**

Yifan Li, Zhenwei Wei, Jiayin Hu,\* Tianlong Deng\*

Tianjin Key Laboratory of Brine Chemical Engineering and Resource Eco-utilization, College of Chemical Engineering and Materials Science, Tianjin University of Science and Technology, Tianjin, China

E-mail: hujiayin@tust.edu.cn; tldeng@tust.edu.cn.

### Content

|                                      |          |
|--------------------------------------|----------|
| <b>1. NMR data of products .....</b> | <b>2</b> |
| <b>2. Figure S1 .....</b>            | <b>3</b> |
| <b>3. Table S1 .....</b>             | <b>3</b> |

## 1. NMR data of products

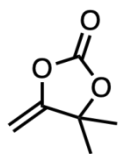

### 4,4-Dimethyl-5-methylene-[1,3]dioxolan-2-one.

$^1\text{H}$  NMR (400 MHz, Chloroform-*d*)  $\delta$  4.76 (s, 1H), 4.30 (s, 1H), 1.61 (s, 6H).  $^{13}\text{C}$  NMR (101 MHz, Chloroform-*d*)  $\delta$  158.75, 151.29, 85.31, 84.64, 27.59.

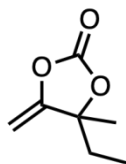

### 4-Ethyl-4-methyl-5-methylene-[1,3]dioxolan-2-one.

$^1\text{H}$  NMR (400 MHz, Chloroform-*d*)  $\delta$  4.78 (d,  $J = 3.9$  Hz, 1H), 4.25 (d,  $J = 3.9$  Hz, 1H), 1.88 (dq,  $J = 14.7, 7.4$  Hz, 1H), 1.73 (dq,  $J = 14.7, 7.4$  Hz, 1H), 1.55 (s, 3H), 0.95 (t,  $J = 7.4$  Hz, 3H).  $^{13}\text{C}$  NMR (101 MHz, Chloroform-*d*)  $\delta$  157.38, 151.56, 87.63, 85.61, 33.36, 25.94, 7.31.

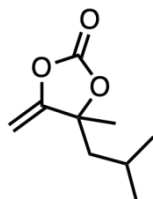

### 4-Isobutyl-4-methyl-5-methylene-[1,3]dioxolan-2-one.

$^1\text{H}$  NMR (400 MHz, Chloroform-*d*)  $\delta$  4.75 (d,  $J = 4.0$  Hz, 1H), 4.25 (d,  $J = 3.9$  Hz, 1H), 1.87–1.73 (m, 2H), 1.68–1.57 (m, 1H), 1.54 (s, 3H), 0.93 (dd,  $J = 6.5, 2.6$  Hz, 6H).  $^{13}\text{C}$  NMR (101 MHz, Chloroform-*d*)  $\delta$  158.26, 151.46, 87.36, 85.60, 48.46, 26.96, 24.27, 23.94, 23.64.

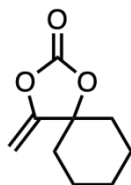

### 4-Methylene-1,3-dioxaspiro[4.5]decan-2-one.

$^1\text{H}$  NMR (400 MHz, Chloroform-*d*)  $\delta$  4.76 (d,  $J = 3.9$  Hz, 1H), 4.33 (d,  $J = 3.9$  Hz, 1H), 2.07–1.95 (m, 2H), 1.75–1.61 (m, 7H), 1.42–1.18 (m, 1H).  $^{13}\text{C}$  NMR (101 MHz, Chloroform-*d*)  $\delta$  158.63, 151.45, 86.42, 85.51, 36.40, 24.25, 21.57.

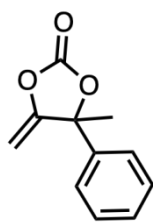

#### 4-Methyl-5-methylidene-4-phenyl-[1,3]dioxolan-2-one.

$^1\text{H}$  NMR (400 MHz, Chloroform-*d*)  $\delta$  7.10–6.94 (m, 5H), 4.50 (d,  $J = 4.1$  Hz, 1H), 4.06 (d,  $J = 4.1$  Hz, 1H), 1.52 (s, 3H).  $^{13}\text{C}$  NMR (101 MHz, Chloroform-*d*)  $\delta$  157.41, 151.25, 139.34, 129.23, 128.98, 124.73, 88.29, 87.25, 27.38.

#### 2. Figure S1

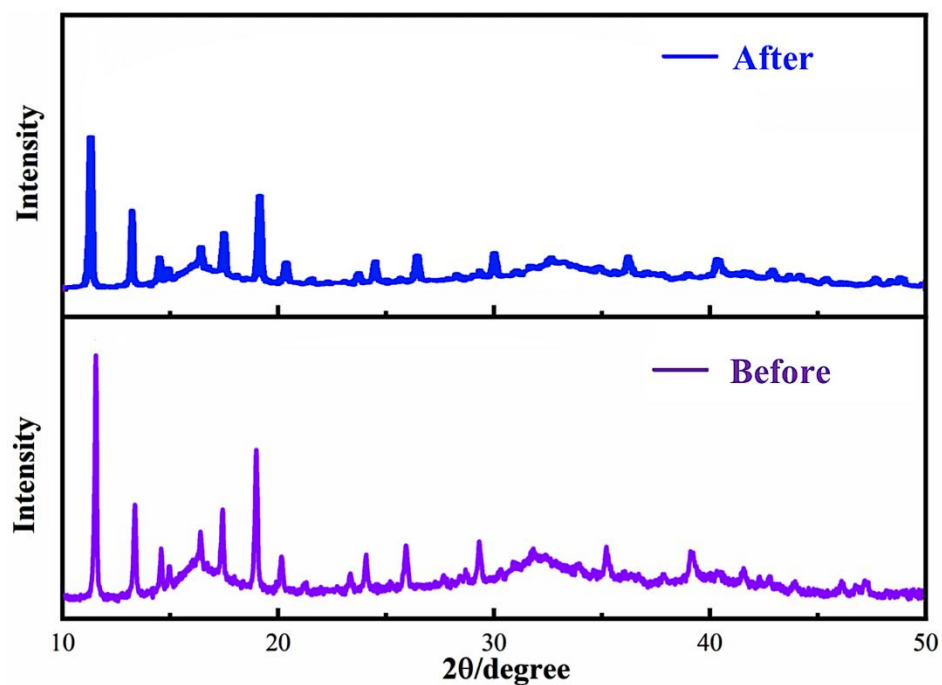

**Figure S1** The XRD spectrum of  $[\text{Cu}^{\text{I}}]\text{-Cu-BTC}$  before and after the catalytic reaction.

#### 3. Table S1

Table S1 A comparison of the catalytic activity  $[\text{Cu}^{\text{I}}]\text{-Cu-BTC}$  in this work and reported Cu(I)-MOFs.

| Entry | Cu(I)-MOFs/co-catalyst                                                                                                                                         | P (MPa) | T (°C) | $t$ (h) | Solvent                | Yield (%) | Ref.      |
|-------|----------------------------------------------------------------------------------------------------------------------------------------------------------------|---------|--------|---------|------------------------|-----------|-----------|
| 1     | $\text{BPDPPrCuCl/CsF}$                                                                                                                                        | 2.0     | r.t.   | 24      | $\text{CH}_3\text{CN}$ | 92        | 1         |
| 2     | $\text{Cu(I)-CN-BPY/TEA}$                                                                                                                                      | 0.5     | 50     | 24      | $\text{CH}_3\text{CN}$ | 96        | 2         |
| 3     | $[\text{Cu}^{\text{I}}(\text{bib})_4\{\text{V}^{\text{V}}_4\text{O}_{12}\}/\text{DBU}$                                                                         | 0.4     | r.t.   | 12      | $\text{CH}_3\text{CN}$ | 99        | 3         |
| 4     | $\{(\text{NH}_2\text{C}_2\text{H}_6)_{0.75}[\text{Cu}_4\text{I}_4(\text{L})_3 \cdot (\text{In})_{0.75}]\cdot \text{DMF} \cdot \text{H}_2\text{O}\}/\text{TEA}$ | 0.5     | 50     | 10      | --                     | 99        | 4         |
| 5     | $[\text{Cu}^{\text{I}}]\text{-Cu-BTC}/[\text{Emim}][\text{OAc}]$                                                                                               | 1.0     | r.t.   | 12      | --                     | 91        | This work |

## References

- [1] A. C. Reyes, K. Farshadfar, M. Rudolph, F. Rominger, T. Schaub, A. Ariafard, A. Stephen, K. Hashmi, *Green Chem.*, 2021, **23**, 889.
- [2] Z. L. Shi, J. C. Jiao, Q. X Han, Y. Xiao, L. K. Huang, M. X. Li, *Molecular Catalysis*, 2020, **496**, 111190.
- [3] H. -R. Tian, Z. Zhang, S. -M. Liu, T. -Y. Dang, Z. Li, Y. Lu, S. -X. Liu, *Green Chem.*, 2020, **22**, 7513.
- [4] S. -L. Hou, J. Dong, X. -L. Jiang, Z. -H. Jiao, B. Zhao, *Angewandte Chemie.*, 2018, **58**, 577.
